# Supplementary material for: Noble gas–metal chemical bonding: the microwave spectra, structures and hyperfine constants of Ar–AuF and Ar–AuBr
Source: Royal Society of Chemistry journal article supplement (doi:10.1039/b004352o), 2000-01-01
Supplement: tables.pdf [file tables.pdf]

Physical Chemistry Chemical Physics

Supplementary data for the paper titled:

**Noble Gas-Metal Chemical Bonding: The Microwave Spectra, Structures  
and Hyperfine Constants of Ar-AuF and Ar-AuBr.**

by

Corey J. Evans, Daryl S. Rubinoff and Michael C. L. Gerry

No. of Tables = 3

Table 1  
Observed transition frequencies (in MHz) of Ar-AuF

| $J'-J''$ | $F'-F''$                    | Ar-AuF     | obs-calc          |
|----------|-----------------------------|------------|-------------------|
| 2-1      | $\frac{1}{2}-\frac{1}{2}$   | 7101.3306  | -0.7 <sup>a</sup> |
|          | $\frac{5}{2}-\frac{3}{2}$   | 7108.2648  | 1.1               |
|          | $\frac{7}{2}-\frac{5}{2}$   | 7108.3723  | -0.1              |
|          | $\frac{3}{2}-\frac{3}{2}$   | 7166.7472  | -0.3              |
| 3-2      | $\frac{5}{2}-\frac{3}{2}$   | 10635.5398 | 0.6               |
|          | $\frac{3}{2}-\frac{1}{2}$   | 10635.9298 | -0.4              |
|          | $\frac{7}{2}-\frac{5}{2}$   | 10655.8307 | -0.2              |
|          | $\frac{9}{2}-\frac{7}{2}$   | 10655.8763 | 0.5               |
| 4-3      | $\frac{7}{2}-\frac{5}{2}$   | 14195.5243 | 0.3               |
|          | $\frac{5}{2}-\frac{3}{2}$   | 14195.6317 | -1.0              |
|          | $\frac{9}{2}-\frac{7}{2}$   | 14205.0294 | 0.7               |
|          | $\frac{11}{2}-\frac{9}{2}$  | 14205.0515 | 0.0               |
| 5-4      | $\frac{9}{2}-\frac{7}{2}$   | 17749.2071 | 1.3               |
|          | $\frac{7}{2}-\frac{5}{2}$   | 17749.2484 | -2.2              |
|          | $\frac{11}{2}-\frac{9}{2}$  | 17754.8219 | -0.6              |
|          | $\frac{13}{2}-\frac{11}{2}$ | 17754.8363 | 0.7               |
| 6-5      | $\frac{11}{2}-\frac{9}{2}$  | 21301.1151 | -2.7              |
|          | $\frac{9}{2}-\frac{7}{2}$   | 21301.1428 | 2.3               |
|          | $\frac{13}{2}-\frac{11}{2}$ | 21304.8620 | 4.9               |
|          | $\frac{15}{2}-\frac{13}{2}$ | 21304.8620 | -3.4              |

<sup>a</sup> Residuals in kHz.

Table 2

Observed transition frequencies (in MHz) of Ar-Au<sup>79</sup>Br and Ar-Au<sup>81</sup>Br in the ground vibrational state.

| $J'-J''$                    | $F'_1-F''_1$                | $F'-F''$                    | Ar-Au <sup>79</sup> Br | obs-calc         | Ar-Au <sup>81</sup> Br | obs-calc         |
|-----------------------------|-----------------------------|-----------------------------|------------------------|------------------|------------------------|------------------|
| 5-4                         | $\frac{11}{2}-\frac{9}{2}$  | 5-4                         | 7746.2400              | 0.5 <sup>a</sup> | 7647.8863              | 0.1 <sup>a</sup> |
|                             | $\frac{13}{2}-\frac{11}{2}$ | 6-5                         | 7749.4942              | 0.0              | 7651.5101              | 0.2              |
|                             | $\frac{11}{2}-\frac{9}{2}$  | 4-3                         |                        |                  | 7652.0173              | -0.3             |
|                             | $\frac{13}{2}-\frac{11}{2}$ | 7-6                         | 7751.3235              | 0.6              | 7653.3238              | 0.6              |
|                             | $\frac{13}{2}-\frac{11}{2}$ | 5-4                         | 7751.5425              | -1.0             |                        |                  |
|                             | $\frac{13}{2}-\frac{11}{2}$ | 8-7                         | 7752.1061              | 0.1              | 7654.0623              | 0.6              |
|                             | $\frac{11}{2}-\frac{9}{2}$  | 7-6                         | 7752.8443              | 0.1              | 7654.7668              | 0.0              |
|                             | $\frac{9}{2}-\frac{7}{2}$   | 6-5                         | 7754.5909              | 0.3              | 7656.6773              | 0.4              |
|                             | $\frac{9}{2}-\frac{7}{2}$   | 4-3                         | 7755.0011              | -0.2             |                        |                  |
|                             | $\frac{9}{2}-\frac{7}{2}$   | 5-4                         | 7755.1091              | -0.7             | 7655.8858              | -0.1             |
|                             | $\frac{11}{2}-\frac{9}{2}$  | 6-5                         | 7755.4487              | 0.4              | 7656.1046              | -0.3             |
|                             | $\frac{7}{2}-\frac{5}{2}$   | 5-4                         | 7762.0838              | 0.2              | 7663.0210              | -0.1             |
|                             | 6-5                         | $\frac{13}{2}-\frac{11}{2}$ | 6-5                    | 9299.0298        | -0.3                   | 9180.9873        |
| $\frac{15}{2}-\frac{13}{2}$ |                             | 7-6                         | 9301.0066              | 0.2              | 9183.2172              | 0.3              |
| $\frac{13}{2}-\frac{11}{2}$ |                             | 5-4                         | 9301.3437              | -0.1             | 9183.4515              | -1.0             |
| $\frac{15}{2}-\frac{13}{2}$ |                             | 6-5                         | 9302.3939              | -0.4             | 9184.7860              | -1.1             |
| $\frac{15}{2}-\frac{13}{2}$ |                             | 8-7                         | 9302.4845              | 0.0              | 9184.7014              | 0.8              |
| $\frac{15}{2}-\frac{13}{2}$ |                             | 9-8                         | 9302.9727              | -0.3             | 9185.1610              | 0.1              |
| $\frac{9}{2}-\frac{7}{2}$   |                             | 4-3                         |                        |                  | 9185.3381              | 0.2              |
| $\frac{13}{2}-\frac{11}{2}$ |                             | 8-7                         | 9303.4314              | -0.1             | 9185.5990              | 0.3              |
| $\frac{13}{2}-\frac{11}{2}$ |                             | 7-6                         | 9304.3756              | 0.0              | 9186.0055              | 0.6              |
| $\frac{11}{2}-\frac{9}{2}$  |                             | 5-4                         | 9304.9223              | -0.2             | 9186.4327              | -0.2             |
| $\frac{11}{2}-\frac{9}{2}$  |                             | 6-5                         |                        |                  | 9186.6222              | 0.1              |
| $\frac{11}{2}-\frac{9}{2}$  |                             | 7-6                         | 9305.6789              | 0.3              | 9187.6635              | 0.1              |
| $\frac{11}{2}-\frac{9}{2}$  |                             | 4-3                         |                        |                  | 9187.9015              | -0.6             |
| $\frac{9}{2}-\frac{7}{2}$   |                             | 5-4                         |                        |                  | 9188.4307              | 0.4              |
| $\frac{9}{2}-\frac{7}{2}$   |                             | 6-5                         | 9309.5325              | -0.5             | 9191.1067              | -0.3             |
| 7-6                         | $\frac{15}{2}-\frac{13}{2}$ | 7-6                         | 10850.9385             | 0.2              | 10713.2159             | 0.4              |
|                             | $\frac{17}{2}-\frac{15}{2}$ | 8-7                         | 10852.2276             | 0.1              | 10714.6896             | -0.4             |
|                             | $\frac{15}{2}-\frac{13}{2}$ | 6-5                         | 10852.4070             | -0.5             | 10714.8137             | -1.2             |
|                             | $\frac{17}{2}-\frac{15}{2}$ | 7-6                         | 10853.1928             | -0.4             | 10715.8074             | -0.8             |
|                             | $\frac{17}{2}-\frac{15}{2}$ | 9-8                         | 10853.4121             | 0.0              | 10715.8843             | 0.6              |
|                             | $\frac{17}{2}-\frac{15}{2}$ | 10-9                        | 10853.7373             | -0.3             | 10716.1901             | -0.2             |
|                             | $\frac{15}{2}-\frac{13}{2}$ | 9-8                         | 10854.0423             | 0.5              | 10716.4806             | 0.0              |
|                             | $\frac{15}{2}-\frac{13}{2}$ | 8-7                         | 10854.3933             | 0.6              | 10716.5857             | 0.0              |

<sup>a</sup> Residuals in kHz.

Table 2 (Continued)

Observed transition frequencies (in MHz) of Ar-Au<sup>79</sup>Br and Ar-Au<sup>81</sup>Br in the ground vibrational state.

| $J'-J''$ | $F'_1-F''_1$                | $F'-F''$ | Ar-Au <sup>79</sup> Br | obs-calc         | Ar-Au <sup>81</sup> Br | obs-calc         |
|----------|-----------------------------|----------|------------------------|------------------|------------------------|------------------|
|          | $\frac{13}{2}-\frac{11}{2}$ | 6-5      |                        |                  | 10717.1172             | 0.3 <sup>a</sup> |
|          | $\frac{11}{2}-\frac{9}{2}$  | 4-3      |                        |                  | 10717.2617             | -1.1             |
|          | $\frac{11}{2}-\frac{9}{2}$  | 5-4      | 10854.5522             | 0.5 <sup>a</sup> | 10716.5037             | 0.3              |
|          | $\frac{13}{2}-\frac{11}{2}$ | 7-6      | 10855.5952             | 0.3              | 10717.3955             | 0.3              |
|          | $\frac{13}{2}-\frac{11}{2}$ | 8-7      | 10856.1290             | 0.3              | 10718.3004             | 0.0              |
|          | $\frac{11}{2}-\frac{9}{2}$  | 6-5      |                        |                  | 10718.6729             | 0.4              |
|          | $\frac{11}{2}-\frac{9}{2}$  | 7-6      | 10858.3489             | 0.2              | 10720.3901             | -0.3             |
| 8-7      | $\frac{17}{2}-\frac{15}{2}$ | 8-7      | 12402.3633             | 0.5              | 12244.9644             | 0.3              |
|          | $\frac{19}{2}-\frac{17}{2}$ | 9-8      | 12403.2493             | 0.1              | 12245.9894             | -0.8             |
|          | $\frac{17}{2}-\frac{15}{2}$ | 7-6      | 12403.3529             | -1.2             | 12246.0624             | -0.3             |
|          | $\frac{19}{2}-\frac{17}{2}$ | 8-7      | 12403.9411             | -1.1             | 12246.8055             | -0.9             |
|          | $\frac{19}{2}-\frac{17}{2}$ | 10-9     | 12404.2104             | 0.9              | 12246.9604             | 1.3              |
|          | $\frac{19}{2}-\frac{17}{2}$ | 11-10    | 12404.4379             | 0.6              | 12247.1731             | -0.5             |
|          | $\frac{17}{2}-\frac{15}{2}$ | 10-9     | 12404.6497             | 0.2              | 12247.3795             | 3.4              |
|          | $\frac{17}{2}-\frac{15}{2}$ | 9-8      | 12404.7764             | 0.5              | 12247.3795             | 0.2              |
|          | $\frac{13}{2}-\frac{11}{2}$ | 6-5      |                        |                  | 12247.5030             | 0.3              |
|          | $\frac{15}{2}-\frac{13}{2}$ | 7-6      | 12405.5234             | 0.9              | 12247.8837             | 1.3              |
|          | $\frac{13}{2}-\frac{11}{2}$ | 5-4      | 12405.6504             | -1.0             | 12247.9734             | -1.0             |
|          | $\frac{15}{2}-\frac{13}{2}$ | 8-7      | 12405.9567             | -0.4             | 12248.1872             | 0.7              |
|          | $\frac{15}{2}-\frac{13}{2}$ | 6-5      | 12406.1025             | -1.2             | 12248.4042             | -2.2             |
|          | $\frac{15}{2}-\frac{13}{2}$ | 9-8      | 12406.4458             | 0.2              | 12248.9098             | 0.4              |
|          | $\frac{13}{2}-\frac{11}{2}$ | 7-6      |                        |                  | 12249.1104             | 0.6              |
|          | $\frac{13}{2}-\frac{11}{2}$ | 8-7      | 12407.8418             | 0.4              | 12250.2803             | -0.1             |

<sup>a</sup> Residuals in kHz.

Table 3

Correlation Coefficients From Least Squares Fit: Ar-AuF

|                  |       |       |      |  |
|------------------|-------|-------|------|--|
| $B_0$            | 1.00  |       |      |  |
| $D_J$            | -0.92 | 1.00  |      |  |
| $eQq(\text{Au})$ | 0.15  | -0.16 | 1.00 |  |

Correlation Coefficients From Least Squares Fit: Ar-Au<sup>79</sup>Br

|                  |       |       |       |       |      |
|------------------|-------|-------|-------|-------|------|
| $B_0$            | 1.00  |       |       |       |      |
| $D_J$            | -0.96 | 1.00  |       |       |      |
| $C_I(\text{Br})$ | -0.28 | 0.19  | 1.00  |       |      |
| $eQq(\text{Au})$ | 0.12  | -0.08 | -0.48 | 1.00  |      |
| $eQq(\text{Br})$ | -0.18 | 0.12  | 0.68  | -0.53 | 1.00 |

Correlation Coefficients From Least Squares Fit: Ar-Au<sup>81</sup>Br

|                  |       |       |       |       |      |
|------------------|-------|-------|-------|-------|------|
| $B_0$            | 1.00  |       |       |       |      |
| $D_J$            | -0.96 | 1.00  |       |       |      |
| $C_I(\text{Br})$ | -0.26 | 0.20  | 1.00  |       |      |
| $eQq(\text{Au})$ | 0.05  | -0.04 | -0.40 | 1.00  |      |
| $eQq(\text{Br})$ | -0.23 | 0.17  | 0.75  | -0.45 | 1.00 |
